# Supplementary material for: Сучасні підходи до лікування гострої крововтрати у дітей
Source: Royal Society of Chemistry journal article supplement (doi:10.1039/d0na00711k), 2011-01-01
Supplement: d0na00711k1.pdf [file d0na00711k1.pdf]

## Supporting Information

### **Core@Shell Sb@Sb<sub>2</sub>O<sub>3</sub> Nanoparticles Anchored on 3D Nitrogen-doped Carbon**

### **Nanosheets as Advanced Anode Materials for Li-ion Batteries**

Xian Chen,<sup>a, b</sup> Liang Wang,<sup>a, b</sup> Feng Ma,<sup>a</sup> Tanyuan Wang,<sup>a</sup> Jiantao Han,<sup>a</sup> Yunhui Huang,<sup>a</sup> Qing Li<sup>a,\*</sup>

<sup>a</sup>State Key Laboratory of Material Processing and Die & Mould Technology, School of Materials Science and Engineering, Huazhong University of Science and Technology, Wuhan 430074, China.

<sup>b</sup>These authors contributed equally to this work.

\*Corresponding Author. E-mail: [qing\\_li@hust.edu.cn](mailto:qing_li@hust.edu.cn) (Q. Li)

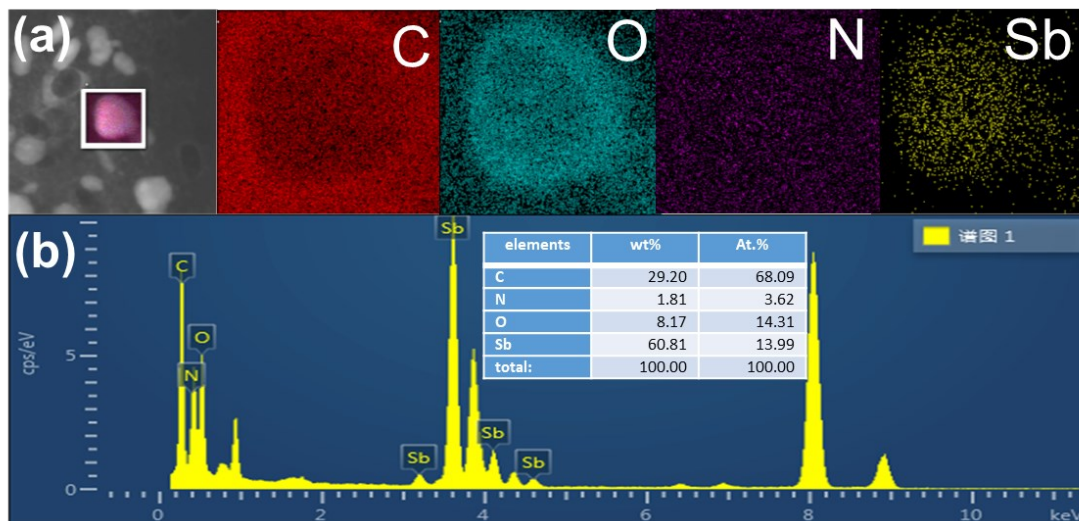

**Figure S1.** (a) EDX elemental mappings and (b) elemental analysis of Sb@Sb<sub>2</sub>O<sub>3</sub>/3DNC.

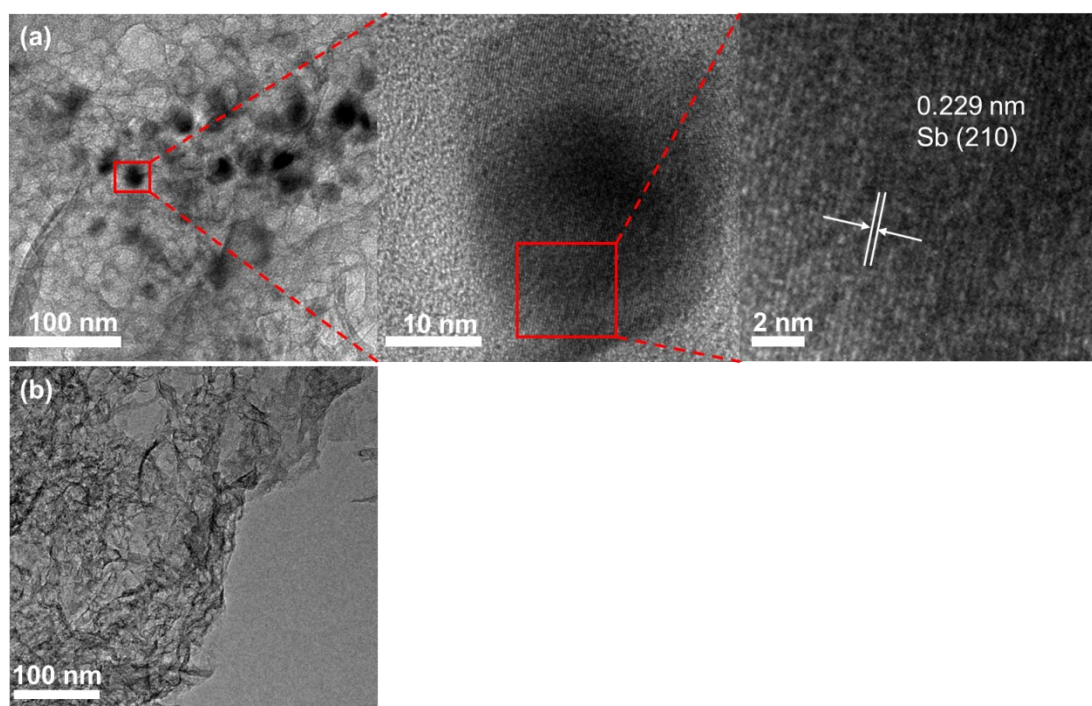

**Figure S2.** TEM and HRTEM images of (a) Sb/3DNC and (b) 3DNC.



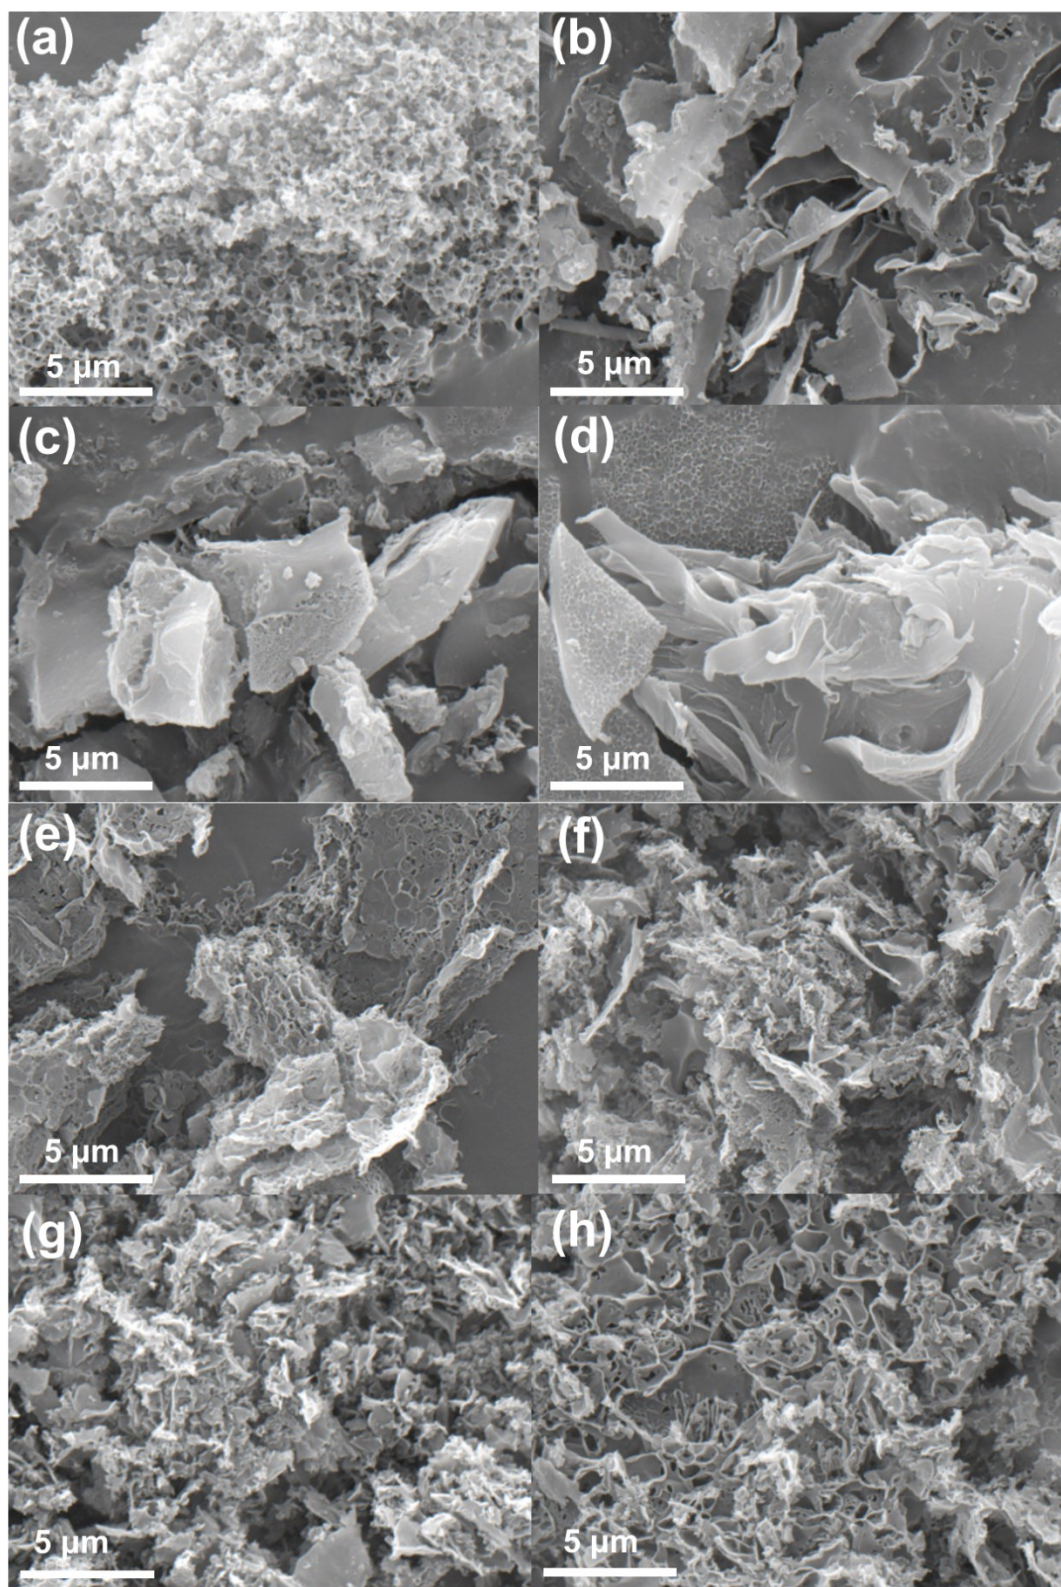

**Figure S3.** SEM images of (a) Sb@Sb<sub>2</sub>O<sub>3</sub>/3DNC; (b) Sb@Sb<sub>2</sub>O<sub>3</sub>/3DNC-noNaCl; (c) Sb@Sb<sub>2</sub>O<sub>3</sub>/3DNC-EV; (d) Sb@Sb<sub>2</sub>O<sub>3</sub>/3DNC-noNaCl-EV; (e) NC; (f) Sb@Sb<sub>2</sub>O<sub>3</sub>/C; (g) Sb/3DNC and (h) 3DNC

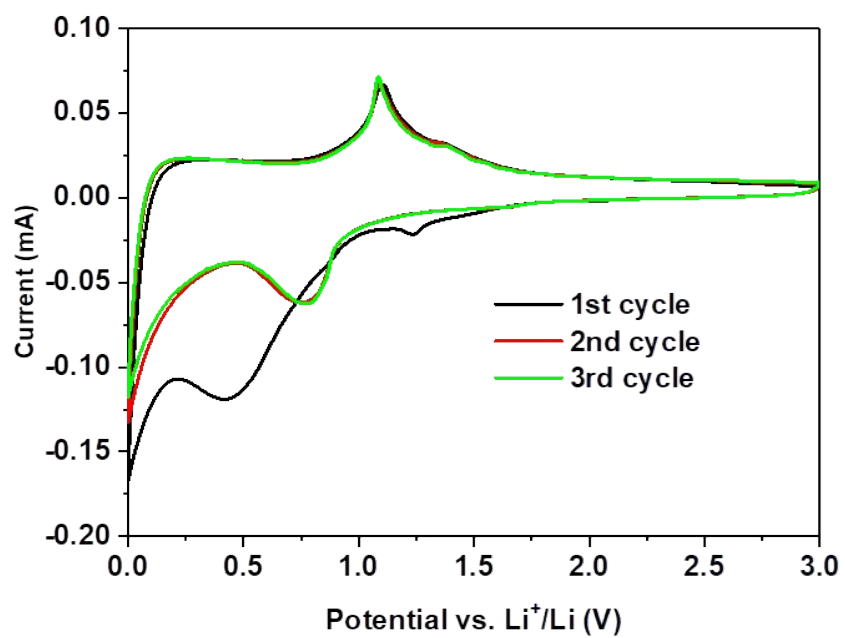

**Figure S4.** Cyclic voltammograms of 1st, 2nd, and 3rd cycles for Sb@Sb<sub>2</sub>O<sub>3</sub>/3DNC between 0 and 3 V at a scan rate of 0.1 mV s<sup>-1</sup> at 25 °C.

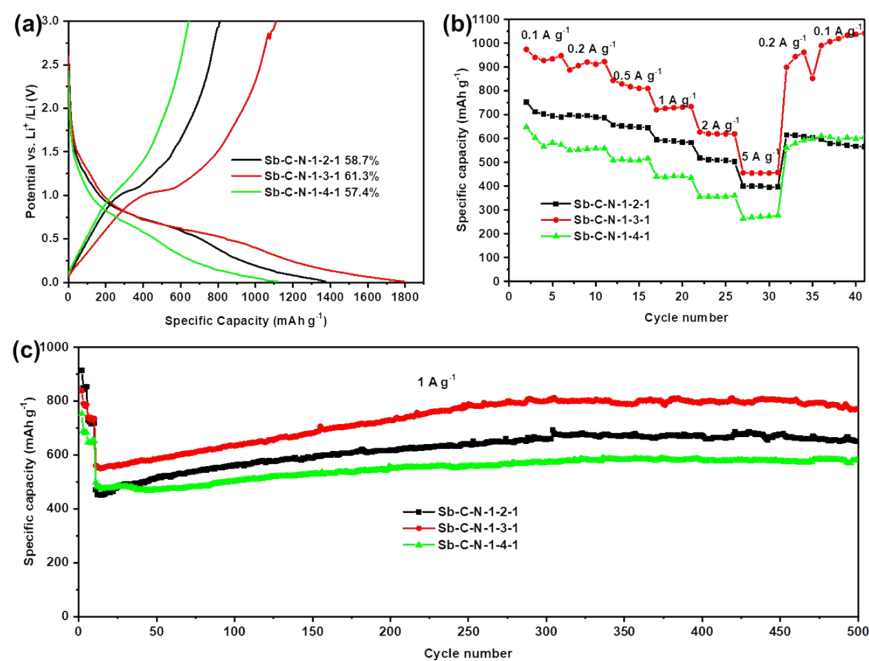

**Figure S5.** (a) The initial charge/discharge curves at 0.1 A g<sup>-1</sup>, (b) rate capability and (c) cycling performance at 1 A g<sup>-1</sup> of the Sb-C-N-1-2-1, Sb-C-N-1-3-1 and Sb-C-N-1-4-1

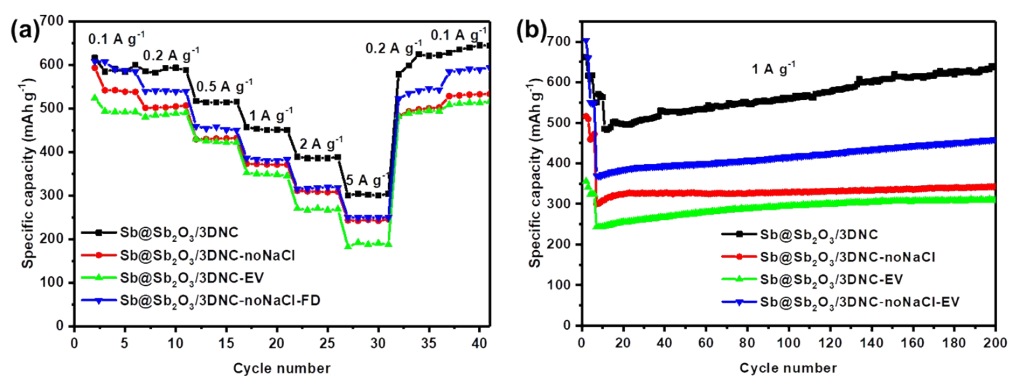

**Figure S6.** (a) Rate capability and (b) cycling performance at 1 A g<sup>-1</sup> of Sb@Sb<sub>2</sub>O<sub>3</sub>/3DNC, Sb@Sb<sub>2</sub>O<sub>3</sub>/3DNC-noNaCl, Sb@Sb<sub>2</sub>O<sub>3</sub>/3DNC-EV and Sb@Sb<sub>2</sub>O<sub>3</sub>/3DNC-noNaCl-EV
